# Supplementary material for: The Malaria Secretome: From Algorithms to Essential Function in Blood Stage Infection
Source: PubMed Central journal article supplement (PMC2408878; doi:10.1371/journal.ppat.1000084), 2008-06-13
Supplement: ppat.1000084.s009.pdf [file ppat.1000084.s009.pdf]

## PFC<sub>0435w</sub>

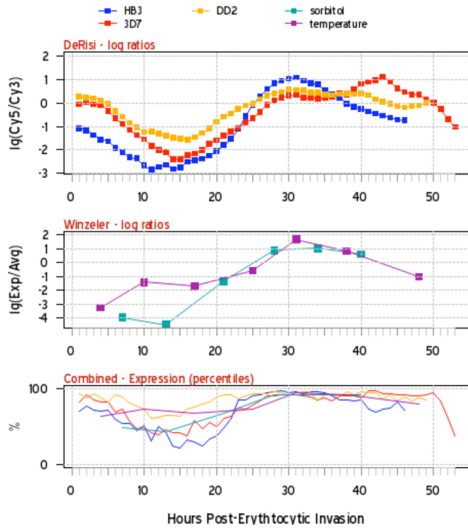

## PF14\_323 (calmodulin)

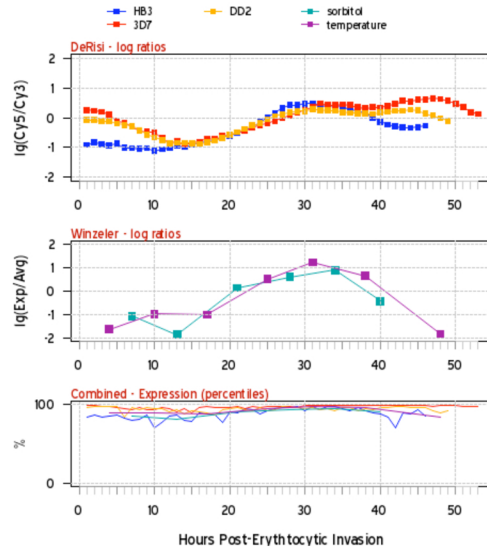

Figure S2

Comparison of expression profiles of PFC0435w (left) and PF14\_323 (calmodulin; right). Top panels show expression levels in *P. falciparum* strains 3D7, DD2 and HB3 with time points taken at every hour. Middle panels represent expression levels in the same three strains synchronized using either sorbitol or temperature, while bottom panels represent level of expression relative to entire genome. Images were taken from PlasmoDB ([www.plasmoDB.org](http://www.plasmoDB.org); [45]). Transcription data in top panels is based on experiments described in [46,47], data in middle and bottom panels are derived from [48].

45. Bahl A, Brunk B, Crabtree J, Fraunholz MJ, Gajria B, et al. (2003) PlasmoDB: the Plasmodium genome resource. A database integrating experimental and computational data. *Nucleic Acids Research* 31: 212-215.
46. Bozdech Z, Llinas M, Pulliam BL, Wong ED, Zhu J, et al. (2003) The transcriptome of the intraerythrocytic developmental cycle of *Plasmodium falciparum*. *Plos Biology* 1: E5.
47. Llinas M, Bozdech Z, Wong ED, Adai AT, DeRisi JL (2006) Comparative whole genome transcriptome analysis of three *Plasmodium falciparum* strains. *Nucleic Acids Research* 34: 1166-1173.
48. Le Roch KG, Zhou Y, Blair PL, Grainger M, Moch JK, et al. (2003) Discovery of gene function by expression profiling of the malaria parasite life cycle. *Science* 301: 1503-1508.
